# Supplementary material for: Small-world challenges and solutions identified by mid-level managers within a decentralised healthcare system during a qualitative sub-study of a tuberculosis-prevention therapy rollout intervention in Uganda: “When a big drum like the District Health Officer talks”
Source: Research Square preprint supplement (doi:10.21203/rs.3.rs-5046392/v1), 2025-07-31
Supplement: Supplementary file 1 [file 574fe010df9861688fb21969.docx]

**SEARCH-IPT – FOCUS GROUP DISCUSSION (FGD) GUIDE**

**Selected DHOs/DTLSs in Intervention Districts (Annual)**

*This FGD Guide is to be used for FGDs selected groups of DHOs or their representatives (DTLs) in SEARCH-IPT intervention arm districts, at 12 and 24 months after the start of the intervention. This FGD guide is designed to elicit, in the intervention arm, DHOs’ and DTLs’ perceptions of the SEARCH-IPT intervention content, its implementation, and its impact on attitudes and practices related to TB screening and isoniazid preventive therapy among HIV-positive patients. The FGD facilitator will follow the questions and suggested prompts in this guide (in italics) but may also insert additional follow up questions and probes as needed to explore the topics in the guide.*

Thank you for kindly agreeing to participate in this discussion today. The purpose of our discussion today is to learn about your experiences in the SEARCH-IPT study up to this point. I will ask you about your thoughts about different components of the study, and about the challenges related to providing TB screening and isoniazid preventive therapy for HIV-infected patients in your district. I would like you to feel very free to share your opinions frankly and openly and also invite you to listen closely to each other. I would like to not miss anything that you share with us, so I will record our discussion so that we can prepare a transcript of it. But if you use anyone’s names here, the names will be redacted from the written transcript. Before we start, let’s set some ground rules. What ground rules should we agree on, today? [*Make sure that ground rules include either silencing or shutting off cell phones*.] Let’s begin.

1. I’d like to start by asking you some questions about your experiences with the Mini-Collaboratives that were set up by the study. If I’m not mistaken, you will have met about three times with other members of your mini-collaboratives, since the first randomization meeting at the very beginning. Thinking about this experience so far, what would you say has been most different and new, compared to other kinds of Ministry of Health sponsored meetings or programs?
2. What do you feel you’ve learned the most from the process so far?
3. If there is anything you’ve enjoyed about it, what would you say has been the most interesting or enjoyable part of meetings with the mini-collaborative group?
4. Now let’s talk about what has been challenging or less enjoyable. What has been the most difficult aspect of your experience with meeting in the mini-collaborative?
5. In the mini-collaboratives, I know that you share with each other the progress you are making in your own district with uptake of INH, and the coach also presents a comparative report showing results across all the districts. The first time this happened, when you saw where your own district stood in comparison to other districts, how did you feel?
6. What has been the effect so far, for you, of seeing your own district’s progress relative to other districts?

- *I’d like to hear about the positive and negative aspects of that process. First, was there anything frustrating about it? [If so:* Tell me about that*.]*
- *What was motivating about it?*
- *How did it affect how you track and oversee progress in your district?*
- *Tell me more about that.*

1. What sorts of changes are there, if any, to the way you communicate with clinic directors in your district about IPT, since the study began? (This also includes communication with any frontline providers you have direct contact with)

- *What are the main ways you communicate with them?*
- *How has that changed, since the study began, if it has changed?*

1. Let’s talk about continuing challenges related to IPT dispensing and delivery in your district. What continue to be the main challenges with TB prevention in the HIV care program?

- *How difficult is it providers in this district to add INH to standard care for HIV+ people in order to prevent TB?*
- *How well-informed do you think the frontline providers are about the importance of implementing IPT? What are their main barriers?*
- *What has been the situation with drug supplies?*
- *What other barriers are there, in your view, to implementing IPT in the HIV care program?*

1. For you as managers, what are the main things that motivate you, personally, to try to influence practices related to HIV care delivery in your district?

- *And what gets in the way— what is demotivating?*
- *What could be done to help support DHOs and DTLs to improve IPT delivery in Uganda?*

1. Let me now open up the discussion to invite you to share with us any feedback you would like to share with the study team about your experiences with the SEARCH-IPT study so far. What else would you like to add to the discussion?

Thank you again for your time and your valuable contributions to this research!

**SEARCH-IPT**

**KEY INFORMANT INTERVIEW (KII) GUIDE**

**Selected DHOs/DTLSs in Control Districts (Annual)**

*This KII Guide is to be used for interviews with selected DHOs and DTLSs in SEARCH-IPT control arm districts, 12, 24 and 36 months after the start of the intervention. [Note: Revise for final data collection point/5 year followup]. This KII guide is designed to elicit, in the control arm, IPT-related secular trends, including perceptions of change in policy, policy communications, attitudes, and practices related to TB screening and treatment among HIV-positive patients, in the absence of intervention. The interviewer will follow the questions and suggested prompts in this guide (in italics) but may also insert additional follow up questions and probes as needed to explore the topics in the guide.*

Thank you for kindly agreeing to participate in this interview today. The purpose of our discussion today is to learn about any changes you perceive in policies or practices related to TB screening and isoniazid preventive therapy for HIV-infected patients in your district. I’ll ask you some questions about any successes or setbacks or challenges. I would like you to feel very free to share your opinions frankly and openly. I would like to not miss anything that you share with us, so I will record our discussion so that we can prepare a transcript of it. To strengthen confidentiality, if you use any names in the discussion, those will be redacted; also, your own name will not be linked in any way with the transcript, and thus anything that you tell me today will not be able to be traced back to you. I will ask you at the end of our conversation about your willingness to talk with us again a year from now, again, to assess any changes in your experiences or views. Do you have any questions for me, before we begin?

1. Let me start by asking you, how severe is the TB disease burden in this district, in your view?

- *Would you say this situation has worsened, or improved, in your district in the past year?*
- *[Allow option that things have not changed. If respondent indicates change:] What accounts for that change?*

1. And what do you think is the standard practice in TB control among HIV-infected patients in your district, currently?

- *How much variation is there, across clinics, in TB prevention in the HIV care program?*
- *Do you see the standard practice as being about the same as it was about a year ago, or has it changed?*
- *[If there have been changes:] How have things changed?*
- *What are the main reasons for those changes?*

1. Now I’d like to ask your opinion about what are the biggest challenges related to IPT dispensing and delivery in your district. What continue to be the main challenges with TB prevention in the HIV care program?

- *How difficult is it providers in this district to add INH to standard care for HIV+ people in order to prevent TB?*
- *How well-informed do you think the frontline providers are about the importance of implementing IPT? What are their main barriers?*
- *What has been the situation with drug supplies?*
- *What other barriers are there, in your view, to implementing IPT in the HIV care program?*

1. In the past year, have there been any changes in policy related to TB prevention in the HIV care program?

- [*If there are any* *changes*:] *How did you learn about the changes?*

1. In the past year, have there been any changes to the way you communicate with clinic directors in your district about IPT? (This also includes communication with any frontline providers you have direct contact with)

- *What are the main ways you communicate with them?*
- *How has that changed, compared to a year ago, if it has changed?*
- *[If respondent shared new information]: What new information have you shared?*

1. For you as a manager, what are the main things that motivate you, personally, to try to influence practices related to HIV care delivery in your district?

- *And what gets in the way— what is demotivating?*
- *What could be done to help support DHOs and DTLs to improve IPT delivery in Uganda?*

1. Let me now invite you to share with us any feedback you would like to share with the study team about your experiences with the SEARCH-IPT study so far. What comments or feedback do you have to share about the study, or about your experience in your professional role in the health system?

Thank you again for your time and your valuable contributions to this research!

**SEARCH-IPT PHASE II BASELINE - FOCUS GROUP DISCUSSION (FGD) GUIDE**

**Selected DHOs/DTLSs and District Health Team Members in Intervention Districts**

*This FGD Guide is to be used for FGDs selected groups of DHOs or their District TB and Leprosy Supervisors (DTLSs) in SEARCH-IPT intervention arm districts, at baseline of Phase II of SEARCH-IPT, 3 years after the start of the intervention. This FGD guide is designed to elicit, in the intervention arm, DHOs’ and DTLSs’ perceptions of the SEARCH-IPT intervention content, their ability to lead and manage their teams, and the usefulness of the skills learned in the ‘One Day MBA’ curriculum. The FGD facilitator will follow the questions and suggested prompts in this guide (in italics) but may also insert additional follow up questions and probes as needed to explore the topics in the guide.*

Thank you for joining me in this discussion. Today we will be talking about your experiences over the course of this study with the mini-collaboratives, with the One Day MBA training program, and with INH delivery in your districts.

1. I’d like to start by asking you to reflect on your experiences with the Mini-Collaboratives over the course of this study. What do you feel you’ve learned the most from the process of participating in the Mini-Collaboratives?
2. Now let’s talk about what has been challenging or less enjoyable. What was the most difficult aspect of your experience with meeting in the mini-collaborative?
3. In the mini-collaboratives, I know that you have shared with each other the progress you are making in your own district with uptake of INH, and the coach also presents a comparative report showing results across all the districts. As this process continued across the meetings, how was it to see where your own district stood in comparison to other districts? What effect did that have on you?

[*Prompts*]

- What was frustrating about it? [If so: Tell me about that.]
- What was motivating about it?
- How did it affect how you track and oversee progress in your district?
- Tell me more about that.

1. What sorts of changes are there, if any, to the way you communicate with clinic directors in your district about IPT, since the study began? (This also includes communication with any frontline providers you have direct contact with)

- What are the main ways you communicate with them?
- How has that changed, since the study began, if it has changed?

1. Let’s talk about continuing challenges related to IPT dispensing and delivery in your district. What continue to be the main challenges with TB prevention in the HIV care program?

- How difficult is it providers in this district to add INH to standard care for HIV+ people in order to prevent TB?
- How well-informed do you think the frontline providers are about the importance of implementing IPT? What are their main barriers?
- What has been the situation with drug supplies?
- What other barriers are there, in your view, to implementing IPT in the HIV care program?

1. For you as managers, what are the main things that motivate you, personally, to try to influence practices related to HIV care delivery in your district?

- And what gets in the way— what is demotivating?
- What could be done to help support DHOs and DTLs to improve IPT delivery in Uganda?

1. To what extent do you feel as though you have the ability to influence health system improvements and health outcomes in your district?

- What barriers do you face on a personal level to make changes in your district?
- What system-level barriers do you face when trying to make positive change in your district?

1. Now I want to ask you some questions about how you have been able to use the content covered in our annual meetings on the ‘One Day MBA’ core competencies in management and leadership (Kotter’s 8 Step Model for Change, Objective Key Results, and Start Stop Continue)

- What skills do feel have been most valuable for you to learn from the training?
- How have you used these skills in your day to day work? [Probe: Can you give me an example?]
- How have these skills have been used in other aspects of your professional life, if at all?

1. Tell me, how have these skills impacted care delivery in your district?

- How were you able to build a ‘guiding coalition’ in your districts?
- In what ways did you develop a ‘change vision’ and share that vision with the teams you supervise?
- Tell me about ‘short term wins’ that you have set and achieved in your districts.
- Can you tell me about the process of identifying ‘Objective Key Results’ for your districts? What kinds of Objective Key Results have been effective in your districts?
- Can you tell me, how have you used the ‘Start. Stop. Continue’ method in your districts?

1. Now I want to talk to you about IPT or INH.

- How has the curriculum taught in this study enabled you to implement plans for improving INH uptake your district, if at all?
- What skills have you learned, if any, during this study that enable you to address potential challenges to implementation of INH?

1. Is there anything you want to add about how the One Day MBA affected your work, or about anything else that we have discussed today?

Thank you again for your time and your valuable contributions to this research!

*[Interviewer: Thank participants and close FGD.]*

**SEARCH-IPT PHASE II POST INTERVENTION - FOCUS GROUP DISCUSSION (FGD) GUIDE**

**Selected DHOs/DTLSs in Intervention Districts**

*This FGD Guide is to be used for FGDs selected groups of DHOs or their District TB and Leprosy Supervisors (DTLSs) in SEARCH-IPT intervention arm districts, at the end of Phase II of SEARCH-IPT, 5 years after the start of the intervention. This FGD guide is designed to elicit, in the intervention arm, DHOs’ and DTLSs’ perceptions of the SEARCH-IPT intervention content, their ability to lead and manage their teams, and the usefulness of the skills learned in the ‘One Day MBA’ curriculum. The FGD facilitator will follow the questions and suggested prompts in this guide (in italics) but may also insert additional follow up questions and probes as needed to explore the topics in the guide.*

1. What extent do you feel as though you have the ability to influence health system improvements and health outcomes in your district?

- What barriers do you face on a personal level to make change in your district?
- What system-level barriers do you face when trying to make positive change in your district?

1. I want to ask you about how you have used the skills developed in the training provided during this study. First, I’ll ask a broad question: What skills have you learned, if any, during this study that helped you to address potential challenges to implementation of INH?
2. What changes did you enact in your work to improve INH uptake by eligible people living in your district?

- How have these changes impacted care delivery in your district?

1. Now I’ll ask some specific questions about the curriculum. How have you used Objective Key Results in your work?

- What were your main objectives for your change vision?
- What were the Key Results (measurable outcomes) for these objectives?
- How did it work to track these key results as progress toward your objectives and overall change vision? *[Elicit factors that facilitated success, challenges encountered]*

1. How have you used the Start Stop Continue toolkit to evaluate your district’s performance?

- Looking back at your objectives you set last quarter and the plans you put into action to achieve them, what were some activities that you wanted to Start, Stop or Continue to improve your performance?
- How did it go to implemented these? *[Elicit factors that facilitated success, challenges encountered]*

1. What other impacts has the Training-of-trainer curriculum had on any aspect of your professional life?
2. Is there anything you want to add about how the One Day MBA affected your work, or about anything else that we have discussed today?

Thank you again for your time and your valuable contributions to this research!

*[Interviewer: Thank participants and close FGD.]*

**SEARCH-IPT PHASE II**

**KEY INFORMANT INTERVIEW (KII) GUIDE**

**Selected District Health Team Members in Intervention Districts at Baseline and Post Intervention**

*This KII Guide is to be used for selected members of District Health Management Teams (DHMTs) who will be trained in the One-Day MBA curriculum by DHOs or their District TB and Leprosy Supervisors (DTLSs) in SEARCH-IPT intervention arm districts, at Phase II baseline (year 3) and end of Phase II of SEARCH-IPT, 5 years after the start of the intervention. This KII guide is designed to elicit, in the intervention arm, DHMT members’ perceptions of the training content, their perceptions of the ability of DHOs/DTLs to lead and manage their teams, and the usefulness of the skills learned in the ‘One Day MBA’ curriculum for both DHOs/DTLs and DHMT members. The interviewer will follow the questions and suggested prompts in this guide (in italics) but may also insert additional follow up questions and probes as needed to explore the topics in the guide.*

1. Let me start by asking you about your role in the health district. Tell me, what are your responsibilities?

- And how is that going?

1. And to what extent do you feel as though you have the ability to influence health system improvements and health outcomes in your district?

- What barriers do you face on a personal level to make change in your district?
- What system-level barriers do you face when trying to make positive change in your district?

1. Tell me please what you may have heard from your District Health Officer about the ‘One-Day MBA’ curriculum. What do you know about it?

- Tell me what topics your DHO talked with you about.
- [*Probes*:] Did you talk at all about Objective Key Results? Kotter’s 8-step model for change? Start Stop Continue?

1. What skills, if any, have you learned from your District Health Officer with respect to leadership and management?

- How have you used these skills?
- [If skills were imparted:] How has learning these skills enabled you to implement plans for improving INH uptake your district, if at all?
- What skills have you learned, if any, that enabled you to address potential challenges to implementation of INH?

1. Now I want to ask you questions about the leadership and management abilities of your supervisors, your District Health Officers. I want to remind you that the responses you provide are kept in the strictest confidence, so please be candid and open.

- To what extent does your DHO share their vision for the health in their district?
- In what way does your DHO work collaboratively with your District Health Team?
- Do you feel your DHO makes and effort to excite the team members about the importance of change?
- How often does your DHO encourage people to share their opinions, concerns, and suggestions for improvement?
- To what extend does your DHO work collaboratively with health workers and the District Health Team to evaluate the status of change efforts and modify as needed?
- Tell me about how your DHO works with health workers to set goals and expectations. Is there a process to do this collaboratively? Please tell me about that.
- How realistic are the goals set in your district? Are there goals set that you see as maybe too challenging to be attainable? Tell me about that.

1. Is the word of the DHO in your district trusted and followed?

- If so, do you find that members of the District Health Team follow advice of the DHO and hold their opinion in high regard?

1. To what extent do you interact with your DHO during your day to day work?

- Do you find that the leadership and management abilities of the DHO affect your ability to successfully conduct your work? [Probe: tell me more about that.]

1. Is there anything you want to add about how the One Day MBA affected your work, or about anything else that we have discussed today?

Thank you again for your time and your valuable contributions to this research!
